# Supplementary material for: Phase behaviour of quasi-block copolymers: A DFT-based Monte-Carlo study
Source: Royal Society of Chemistry journal article supplement (doi:10.1039/b911364a), 2009-01-01
Supplement: b911364a.pdf [file b911364a.pdf]

# Supramolecular bond forming / breaking moves: microscopic reversibility

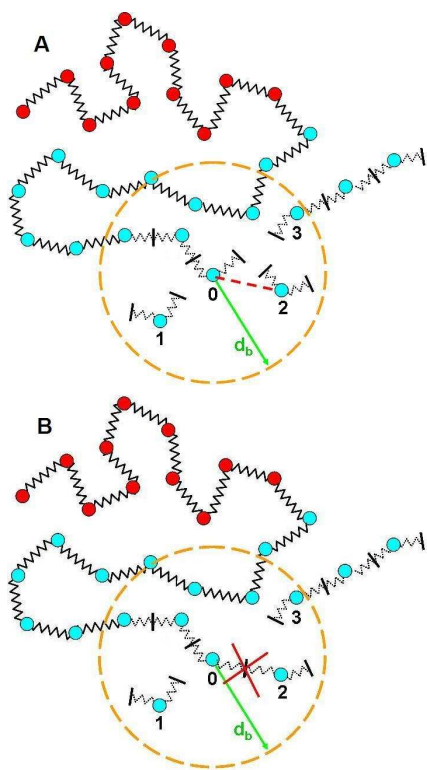

Figure 1: A) A sketch showing the configuration,  $m$ , before attempting the formation of the 0 – 2 bond (red dashed line). The sphere containing the potential bonding partners is indicated by a dashed orange circle with radius,  $d_b$ . In this specific configuration, the potential bonding partners of segment, 0, are numbered 1, 2, and 3, i.e.,  $N_n = 3$ , and the number of monomers bonded to segment 0 is  $N_c = 1$ . B) A sketch of the configuration,  $n$ , before attempting to break the bond and reverse the move of A. The number of potential bonding partners of segment 0 within the sphere of radius,  $d_b$ , is  $\tilde{N}_n = N_n - 1 = 2$  while the number of bonded neighbours is  $\tilde{N}_c = N_c + 1 = 2$ .

The acceptance criterion for the bond forming / breaking moves is illustrated following standard simulation textbooks [1, 2, 3, 4] and earlier works [5, 6, 7, 8, 9, 10, 11], in the Fig. 1. Panel A shows the configuration before attempting to create a bond between segment 0 and one of the three potential bonding partners 1, 2, and 3 (i.e. here  $N_n = 3$ ) within the sphere of radius  $d_b$ . Denoting as  $m$  the state where the bond 0 – 2 does not exist (Fig. 1A) and  $n$  where it has been formed (Fig. 1B), we require the transition probabilities to obey the condition of detailed balance.

$$P_m P_{m \rightarrow n} = P_n P_{n \rightarrow m} \quad (1)$$

where  $P_m$  and  $P_n$  are the equilibrium probabilities of observing the states  $m$  and  $n$ , while  $P_{m \rightarrow n}$  and  $P_{n \rightarrow m}$  denote the probabilities of making a transition from the state  $m$  to state  $n$  and from state  $n$  to  $m$ , respectively. These transition probabilities take the form

$$P_{m \rightarrow n} = a_{m \rightarrow n} P_{m \rightarrow n}^{\text{acc}} \quad (2)$$

where  $a_{m \rightarrow n}$  is probability, with which a transition  $m \rightarrow n$  is proposed in the course of the Monte-Carlo simulation.  $P_{m \rightarrow n}^{\text{acc}}$  denotes the probability of *accepting* this bond-forming attempt (see Eqs. (7) and (8) of the main text). Similarly,  $a_{n \rightarrow m}$  and  $P_{n \rightarrow m}^{\text{acc}}$  are the corresponding probabilities for the bond-breaking transition,  $n \rightarrow m$ .

In the bond-forming move,  $m \rightarrow n$ , one of the  $N_n$  potential bonding partners is chosen with a probability, which is proportional to the Boltzmann weight of the bonded interaction, i.e., the probability to propose the move,  $m \rightarrow n$ , equals:

$$a_{m \rightarrow n} = \frac{w_{01}}{\underbrace{w_{01} + w_{02} + w_{03}}_{Z_{\text{bond}} = \sum_{j=1}^{N_n} w_{0j}}} \quad (3)$$

where  $w_{0j}$  stands for the Boltzmann factor  $\exp\left[-\frac{3}{2b^2} [\mathbf{r}_0 - \mathbf{r}_j]^2\right]$  of the bonded interaction. In the specific example, the number of segments bonded to 0 is  $N_c = 1$ .

In the bond-breaking attempt, one of the bonds, which is connected to segment 0, is randomly selected. Thus, the probability to propose the reverse, bond-breaking move,  $n \rightarrow m$ , is:

$$a_{nm} = \frac{1}{\tilde{N}_c} = \frac{1}{N_c + 1} \quad (4)$$

where  $\tilde{N}_c = N_c + 1 = 2$  denotes the number of bonded neighbours of segment 0 in Fig. 1B.

In order to fulfil detailed balance, we compute  $Z_{\text{bond}} = w_{01} + w_{02} + w_{03}$ , exactly as in the bond-formation move by summing the Boltzmann factors of all segments,  $\tilde{N}_n = N_n - 1$ , that are available for bonding, 0 – 1 and 0 – 3, and, additionally, the bond, 0 – 2, which is to be broken.

Following Eq. (7) and Eq. (8) of the main text, we use the acceptance probabilities,

$$P_{m \rightarrow n}^{\text{acc}} = \min\left[1, \frac{Z_{\text{bond}}}{N_c + 1} \exp\left[-\frac{E_b}{k_B T}\right]\right] \quad (5)$$

and

$$\begin{aligned} P_{n \rightarrow m}^{\text{acc}} &= \min\left[1, \frac{\tilde{N}_c}{Z_{\text{bond}}} \exp\left[\frac{E_b}{k_B T}\right]\right] \\ &= \min\left[1, \frac{N_c + 1}{Z_{\text{bond}}} \exp\left[\frac{E_b}{k_B T}\right]\right] \end{aligned} \quad (6)$$

Using the identity  $x = \frac{\min(1,x)}{\min(1,1/x)}$ , we find

$$\frac{P_{m,n}}{P_{n,m}} = w_{02} \exp\left[-\frac{E_b}{k_B T}\right] \quad (7)$$

Since the right hand side equals the ratio,

$$\frac{P_n}{P_m} = \exp\left[-\frac{3}{2b^2} (\mathbf{r}_2 - \mathbf{r}_0)^2 - \frac{E_b}{k_B T}\right] \quad (8)$$

of the equilibrium weights of the two states, the choice of acceptance probability satisfies detailed balance, Eq. (1).

## References

- [1] K. Binder, *Monte Carlo and Molecular Dynamics Simulations in Polymer Science*, Oxford University Press: New York, 1995.
- [2] D.N. Theodorou and M. Kotelyanskii, Eds. *Simulation Methods for Polymers*, Marcel Dekker: New York, 2004.
- [3] D. Frenkel and B. Smit, *Understanding Molecular Simulation*,
- [4] M.P. Allen and D.J. Tildesley, *Computer Simulations of Liquids*, Oxford University Press: New York, 1991.
- [5] M. Müller and K. Binder, *Macromolecules*, 1995, **28**, 1825.
- [6] M. Müller and N.B. Wilding, *Phys. Rev. E*, 1996, **51** 2079.
- [7] J.P. Wittmer, A. Milchev, and M.E. Cates, *J. Chem. Phys.*, 1998, **109**, 834.
- [8] A. Milchev, J.P. Wittmer, and D.P. Landau, *Phys. Rev. E*, 2000, **61**, 2959.
- [9] C.C. Huang, H. Xu, F. Crevel, J. Wittmer, and J.P. Ryckaert, *Lect. Notes Phys.*, 2006, **704**, 379.
- [10] C.C. Chen and E.E. Dormidontova, *Macromolecules*, 2004, **37**, 3905.
- [11] C.C. Chen and E.E. Dormidontova, *Macromolecules*, 2006, **39**, 9528.
